# Supplementary material for: Biofilm Production Ability, Virulence and Antimicrobial Resistance Genes in Staphylococcus aureus from Various Veterinary Hospitals
Source: MDPI journal article supplement (doi:10.3390/pathogens9040264), 2020-04-04
Supplement: s1 [file s1]

**Table S1.** Primer sequences used to amplify specific virulence, antimicrobial resistance genes in this study.

| Target                       | Gene                    | Primer Sequence                                                   | T <sub>m</sub> (°C) | Amplicon Size | Positive Control Strain              | Reference |
|------------------------------|-------------------------|-------------------------------------------------------------------|---------------------|---------------|--------------------------------------|-----------|
| Methicillin                  | <i>mecA</i>             | F-GTGAAGATATACCAAGTGATT<br>R-ATGCGCTATAGATTGAAAGGAT               | 55                  | 533           | ATCC 43300 <sup>a</sup>              | [1]       |
|                              | <i>mecC</i>             | F-GAAAAAAGGCTTAGAACGCCTC<br>R-GAAGATCTTTCCGTTTTCAGC               | 54                  | 138           | MRSA 123A <sup>a</sup>               | [2]       |
| Oxazolidinone                | <i>cfr</i>              | F-TGAAGTATAAAGCAGGTTGGGAGTCA<br>R-ACCATATAATTGACCACAAGCAGC        | 48                  | 746           | <i>E. faecalis</i> 147C <sup>a</sup> | [3]       |
|                              | <i>optrA</i>            | F-AGGTGGTCAGCGAACTAA<br>R-ATCAACTGTTCCATTCA                       | 55                  | 1395          | <i>E. faecalis</i> 147C <sup>a</sup> | [4]       |
| Vancomycin                   | <i>vanA</i>             | F-GGCAAGTCAGGTGAAGATG<br>R-ATCAAGCGGTCAATCAGTTC                   | 55                  | 713           | <i>E. faecium</i> A4 <sup>a</sup>    | [5]       |
|                              | <i>vanB</i>             | F-GTGACAAACCGGAGGCGAGGA<br>R-CCGCCATCCTCTGCAAAAAA                 | 50                  | 430           | <i>E. faecium</i> 56C <sup>a</sup>   | [5]       |
| Erythromycin                 | <i>ermA</i>             | F-GTTCAAAGAACAATCAATACAGAG<br>R-GGATCAGGAAAAGGACATTTTAC           | 47                  | 421           | MSSA 195A <sup>a</sup>               | [6]       |
|                              | <i>ermB</i>             | F-CCGTTTACGAAATTGGAACAGGTAAAGGGC<br>R-GAATCGAGACTTGAGTGTGC        | 47                  | 359           | MSSA 96A <sup>a</sup>                | [6]       |
|                              | <i>ermC</i>             | F-GCTAATATGTTTAAATCGTCAATTCC<br>R-GGATCAGGAAAAGGACATTTTAC         | 47                  | 572           | MSSA 96A <sup>a</sup>                | [6]       |
| Tetracycline                 | <i>tetK</i>             | F-TGCATAGGAACAGCAGTA<br>R-CAGCAGATCCTACTCCTT                      | 57                  | 169           | MRSA 109A <sup>a</sup>               | [2]       |
| Aminoglycoside               | <i>aac(6')-aph(2'')</i> | F-TAATCCAAGAGCAATAAGGGC<br>R-GCCACACTATCATAACCACTA                | 55                  | 348           | MRSA 3A <sup>a</sup>                 | [7]       |
|                              | <i>lukS/F-PV</i>        | F-ATCATTAGGTAAATGTCTGGACATGATCCA<br>R-GCATCAAGTGTATTGGATAGCAAAAGC | 56                  | 443           | ATCC 49775 <sup>a</sup>              | [2]       |
| Leukocidin                   | <i>lukD</i>             | F-TTGCACTGCTTTTGCTATCG<br>R-GCATTGATGTGTTGGCAAG                   | 53                  | 675           | ATCC 33591 <sup>a</sup>              | [8]       |
|                              | <i>lukE</i>             | F-GATTGCGCCTTAGCATCTC<br>R-GCTGAACCTGTTGGACCATT                   | 55                  | 612           | ATCC 33591 <sup>a</sup>              | [8]       |
| Alpha-hemolysin              | <i>hla</i>              | F-TGCCGCAGATTCTGATATTAA<br>R-TTCTGAAGAACGATCTGTCCA                | 51                  | 845           | MRSA 13A <sup>a</sup>                | [9]       |
| Beta-hemolysin               | <i>hlyB</i>             | F-TATCCAAACTGGGGGCAATA<br>R-AACCGCTTTTGAAAAACATGC                 | 50                  | 292           | NCTC 7428 <sup>b</sup>               | [8]       |
| Delta-hemolysin              | <i>hlyD</i>             | F-TAATTAAGGAAGGAGTGATTTCAATG<br>R-TTTTATAGTGAATTTGTCTACTGTGTC     | 51                  | 100           | NCTC 9393 <sup>b</sup>               | [8]       |
| Toxic shock syndrome toxin-1 | <i>tst</i>              | F-TTTTTATCGTAAGCCCTTTGTTGC<br>R-CACCCGTTTTATCGCTTGAA              | 51                  | 550           | ATCC 33586 <sup>a</sup>              | [9]       |
|                              | <i>eta</i>              | F-CTAGTGCATTTGTTATTCAAGACG<br>R-TGCATTGACACCATAAGTACTATTTC        | 53                  | 119           | MRSA 273A <sup>a</sup>               | [8]       |
| Exfoliative toxin            | <i>etb</i>              | F-ACGGCTATATACATTCATTCATTG<br>R-AAAGTTATTCATTTAATGCATGTCTC        | 53                  | 262           | MRSA 277A <sup>a</sup>               | [8]       |
|                              | <i>sea</i>              | F-CGATCAATTTATGGCTAGACGG<br>R-TTGCTTGAAGATCCAACCTCTG              | 50                  | 101           | ATCC 13566 <sup>b</sup>              | [10]      |
|                              | <i>seb</i>              | F-AAGGACACTAAGTTAGGGAATT<br>R-GTTACACCACCATACATAAAG               | 50                  | 197           | ATCC 13566 <sup>b</sup>              | [10]      |
|                              | <i>sec</i>              | F-GGTAAAGTTACAGGTGGCAAAA<br>R-TCTTGAGCTGTTGCACTTTTCT              | 50                  | 170           | ATCC 19095 <sup>b</sup>              | [10]      |
|                              | <i>sed</i>              | F-GTTTGATTCTCTGATGGGTC<br>R-TGTCAATATGAAGGTGCTCTG                 | 50                  | 128           | ATCC 23235 <sup>b</sup>              | [10]      |
|                              | <i>see</i>              | F-TAATAACCGATTGACCGAAGA<br>R-ATAACTTACCGTGGACCTTC                 | 50                  | 244           | ATCC 27664 <sup>b</sup>              | [10]      |
|                              | <i>seg</i>              | F-AAGTAGACATTTTGGCGTTCC<br>R-AGAACCATCAAACCTCGTATAGC              | 50                  | 287           | MRSA 3A <sup>a</sup>                 | [10]      |
|                              | <i>seh</i>              | F-GTCTATATGGAGGTACAACACT<br>R-GACCTTACTTATTTGCTGTGTC              | 53                  | 213           | ATCC 51811 <sup>b</sup>              | [10]      |
| Enterotoxins                 | <i>sei</i>              | F-GGTGATATTGGTGTAGGTAAAC<br>R-ATCCATATCTTTGCCCTTACCAG             | 55                  | 454           | MRSA 3A <sup>a</sup>                 | [10]      |
|                              | <i>sej</i>              | F-ATAGCATCAGAACTGTTGTTCCG<br>R-CTTCTGAATTTTACCACCAAAGG            | 55                  | 152           | MRSA46A <sup>a</sup>                 | [10]      |
|                              | <i>sek</i>              | F-TAGGTGTCTCTAATAATGCCA<br>R-TAGATATTCGTTAGTAGCTG                 | 55                  | 293           | MRSA 238A <sup>a</sup>               | [10]      |
|                              | <i>sel</i>              | F-TAACGGCGATGTAGGTCCAGG<br>R-CATCTATTTCTTGTCGGTAAC                | 52                  | 383           | MRSA 238A <sup>a</sup>               | [10]      |
|                              | <i>sem</i>              | F-GGATAATTGACAGTAACAG<br>R-TCCTGCATTAATCCAGAAC                    | 50                  | 379           | MRSA 3A <sup>a</sup>                 | [10]      |
|                              | <i>sen</i>              | F-TATGTTAATGCTGAAGTAGAC<br>R-ATTTCCAAAATACAGTCCATA                | 51                  | 282           | MRSA 3A <sup>a</sup>                 | [10]      |
|                              | <i>seo</i>              | F-TGTGTAAGAAGTCAAGTGTAG                                           | 53                  | 214           | MRSA 3A <sup>a</sup>                 | [10]      |

|            |             |                               |    |      |                         |      |
|------------|-------------|-------------------------------|----|------|-------------------------|------|
| ica operon |             | R-TCTTTAGAAATCGCTGATGA        |    |      |                         |      |
|            | <i>icaA</i> | F-ACACTTGCTGGCGCAGTCAA        | 51 | 188  | MSSA 96A <sup>a</sup>   | [11] |
|            |             | R-TCTGGAACCAACATCCAACA        |    |      |                         |      |
|            | <i>icaD</i> | F-ATGGTCAAGCCCAGACAGAG        | 55 | 198  | MSSA 96A <sup>a</sup>   | [11] |
|            |             | R-AGTATTTTCAATGTTTAAAGCAA     |    |      |                         |      |
|            | <i>icaB</i> | F-AGAATCGTGAAGTATAGAAAATT     | 54 | 880  | MSSA 96A <sup>a</sup>   | [11] |
|            |             | R-TCTAATCTTTTCATGGAATCCGT     |    |      |                         |      |
|            | <i>icaC</i> | F-ATGGGACGGATTCCATGAAAAAGA    | 50 | 1066 | MSSA 96A <sup>a</sup>   | [11] |
|            |             | R-TAATAAGCATTAAATGTTCAATT     |    |      |                         |      |
|            | <i>icaR</i> | F-ATCTAATACGCCTGAGGA          | 50 | 205  | MSSA 96A <sup>a</sup>   | [11] |
| Adhesion   |             | R-TTCTTCCACTGCTCCAA           |    |      |                         |      |
|            | <i>clfA</i> | F-ATTGGCGTGGCTTCAGTGCT        | 53 | 288  | ATCC 25923 <sup>a</sup> | [11] |
|            |             | R-CGTTTCTTCCGTAGTTGCATTTG     |    |      |                         |      |
|            | <i>clfB</i> | F-CACTTACTTTACCGCTACTTTC      | 53 | 968  | ATCC 25923 <sup>a</sup> | [11] |
|            |             | R-AACGAGCAATACCACTACAACAG     |    |      |                         |      |
|            | <i>fnbA</i> | F-ACCGTCAAACGCAACACAAG        | 53 | 259  | ATCC 33591 <sup>a</sup> | [11] |
|            |             | R-TTCTGATGCCGTCTTGGCT         |    |      |                         |      |
|            | <i>fnbB</i> | F-GTAACAGCTAATGGTCGAATTGATACT | 56 | 523  | ATCC 33591 <sup>a</sup> | [11] |
|            |             | R-CAAGTTCGATAGGAGTACTATGTTT   |    |      |                         |      |
|            | <i>cidA</i> | F-AGCGTAATTTTCGGAAGCAACATCCA  | 54 | 170  | ATCC 33591 <sup>a</sup> | [11] |
| Others     |             | R-CCCTTAGCCGGCAGTATTGTTGGTC   |    |      |                         |      |
|            | <i>fib</i>  | F-CTACAACACTACAATTGCGTCAACAG  | 54 | 405  | ATCC 33591 <sup>a</sup> | [11] |
|            |             | R-GCTCTGTGAAGACATTTCTTCAC     |    |      |                         |      |
|            | <i>bap</i>  | F-CCATATATCGAAGGTGTAGAATTG    | 54 | 971  | MRSA 158A <sup>a</sup>  | [11] |
|            |             | R-GCTGTTGAAGTTAATACTGTACCTGC  |    |      |                         |      |
|            | <i>cna</i>  | F-AAAGCGTTGCCTAGTGGAGA        | 50 | 192  | ATCC 33591 <sup>a</sup> | [11] |
|            |             | R-AGTGCCTTCCCAAACCTTTT        |    |      |                         |      |
|            | <i>ebps</i> | F-AGAATGCTTTTGCAATGGAT        | 51 | 652  | ATCC 25923 <sup>a</sup> | [11] |
|            |             | R-AATATCGCTAATGCACCGAT        |    |      |                         |      |
|            | <i>eno</i>  | F-TGCCGTAGGTGACGAAGGTGGTT     | 50 | 196  | ATCC 33591 <sup>a</sup> | [11] |
| Others     |             | R-GCACC GTGTTGCGCTTCGAACT     |    |      |                         |      |
|            | <i>sdrC</i> | F-ACGACTATTAAACCAAGAAC        | 50 | 560  | ATCC 33591 <sup>a</sup> | [11] |
|            |             | R-GTACTTGAAATAAGCGGTTG        |    |      |                         |      |
|            | <i>sdrD</i> | F-GGAATAAAAGTTGAAGTTTC        | 52 | 500  | ATCC 33591 <sup>a</sup> | [11] |
|            |             | R-ACTTTGTCACTCAACTGTAAT       |    |      |                         |      |
|            | <i>sdrE</i> | F-CAGTAAATGTGTCAAAAAGA        | 52 | 767  | ATCC 33591 <sup>a</sup> | [11] |
|            |             | R-TTGA CTACCAGCTATATC         |    |      |                         |      |
|            | <i>nuc</i>  | F-GCGATTGATGGTGATACGGTT       | 55 | 270  | ATCC 29213 <sup>a</sup> | [2]  |
|            |             | R-AGCCAAGCCTTGACGAATAAAGC     |    |      |                         |      |
|            | <i>spa</i>  | F-TAAAGACGATCCTTCGGTGAGC      | 60 | -    | ATCC 29213 <sup>a</sup> | [6]  |
|            |             | R-CAGCAGTAGTGCCGTTTGCTT       |    |      |                         |      |

ATCC: American Type Culture Collection; MRSA: methicillin-resistant *Staphylococcus aureus*; *E. faecalis*: *Enterococcus faecalis*; *E. faecium*: *Enterococcus faecium*; MSSA: methicillin-susceptible *Staphylococcus aureus*; NCTC: National Collection of Type Cultures.

<sup>a</sup> These strains were obtained from the college of veterinary medicine of south China agricultural university. Except for ATCC strains, all strains were completely sequenced using Illumina Hiseq TM2000 sequencing platform.

<sup>b</sup> These strains were obtained from the China General Microbiological Culture Collection Center.

## References

1. Zhang, K.Y.; McClure, J.A.; Elsayed, S.; Louie, T.; Conly, J.M. Novel multiplex PCR assay for characterization and concomitant subtyping of staphylococcal cassette chromosome mec types I to V in methicillin-resistant *Staphylococcus aureus*. *J Clin Microbiol.* **2005**, *43*, 5026–5033.
2. Dweba, C.C.; Zishiri, O.T.; El Zowalaty, M.E. Isolation and Molecular Identification of Virulence, Antimicrobial and Heavy Metal Resistance Genes in Livestock-Associated Methicillin-Resistant *Staphylococcus aureus*. *Pathogens.* **2019**, *8*.
3. Kehrenberg, C.; Schwarz, S. Distribution of florfenicol resistance genes *fexA* and *cfr* among chloramphenicol-resistant *Staphylococcus* isolates. *Antimicrob Agents Chemother.* **2006**, *50*, 1156–1163.
4. Wang, Y.; Lv, Y.A.; Cai, J.C.; Schwarz, S.; Cui, L.Q.; Hu, Z.D.; Zhang, R.; Li, J.; Zhao, Q.; He, T.; et al. A novel gene, *optrA*, that confers transferable resistance to oxazolidinones and phenicols and its presence in *Enterococcus faecalis* and *Enterococcus faecium* of human and animal origin. *J Antimicrob Chemother.* **2015**, *70*, 2182–2190.
5. Al-Amery, K.; Elhariri, M.; Elsayed, A.; El-Moghazy, G.; Elhelw, R.; El-Mahallawy, H.; El Hariri, M.; Hamza, D. Vancomycin-resistant *Staphylococcus aureus* isolated from camel meat and slaughterhouse workers in Egypt. *Antimicrob Resist Infect Control.* **2019**, *8*, 129.
6. Li, X.; Huang, T.; Xu, K.; Li, C.; Li, Y. Molecular characteristics and virulence gene profiles of *Staphylococcus aureus* isolates in Hainan, China. *BMC Infect Dis.* **2019**, *19*, 873.
7. Khosravi, A.D.; Jenabi, A.; Montazeri, E.A. Distribution of genes encoding resistance to aminoglycoside modifying enzymes in methicillin-resistant *Staphylococcus aureus* (MRSA) strains. *Kaohsiung J Med Sci.* **2017**, *33*, 587–593.
8. Shukla, S.K.; Karow, M.E.; Brady, J.M.; Stemper, M.E.; Kislow, J.; Moore, N.; Wroblewski, K.; Chyou, P.H.; Warshauer, D.M.; Reed, K.D.; et al. Virulence genes and genotypic associations in nasal carriage, community-associated methicillin-susceptible and methicillin-resistant USA400 *Staphylococcus aureus* isolates. *J Clin Microbiol.* **2010**, *48*, 3582–3592.
9. Ote, I.; Taminiau, B.; Duprez, J.N.; Dizier, I.; Mainil, J.G. Genotypic characterization by polymerase chain reaction of *Staphylococcus aureus* isolates associated with bovine mastitis. *Vet Microbiol.* **2011**, *153*, 285–292.
10. Wu, Y.H.; Li, J.; Qiao, M.F.; Meng, D.; Meng, Q.L.; Qiao, J.; Zhang, X.X.; Wang, L.X.; Cai, K.J.; Zhang, J.S.; et al. Characteristic profiles of biofilm, enterotoxins and virulence of *Staphylococcus aureus* isolates from dairy cows in Xinjiang Province, China. *J Vet Sci.* **2019**, *20*, e74.
11. Chen, Q.; Xie, S.M.; Lou, L.Q.; Cheng, S.; Liu, X.D.; Zheng, W.; Zheng, Z.B.; Wang, H.Q. Biofilm formation and prevalence of adhesion genes among *Staphylococcus aureus* isolates from different food sources. *Microbiologyopen.* **2020**, *9*, e00946.
